# Supplementary material
Source: Springer Nature journal article supplement (https://www.springermedizin.de/resource/supplementary/12974_2011_432_MOESM2_ESM.pdf/9601280)

# Intracellular ROS

(% of Control, OD at Ex<sub>485</sub> Em<sub>538</sub>)

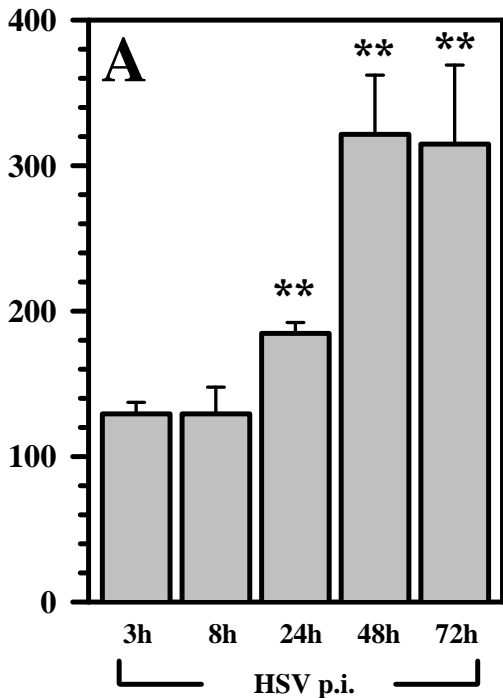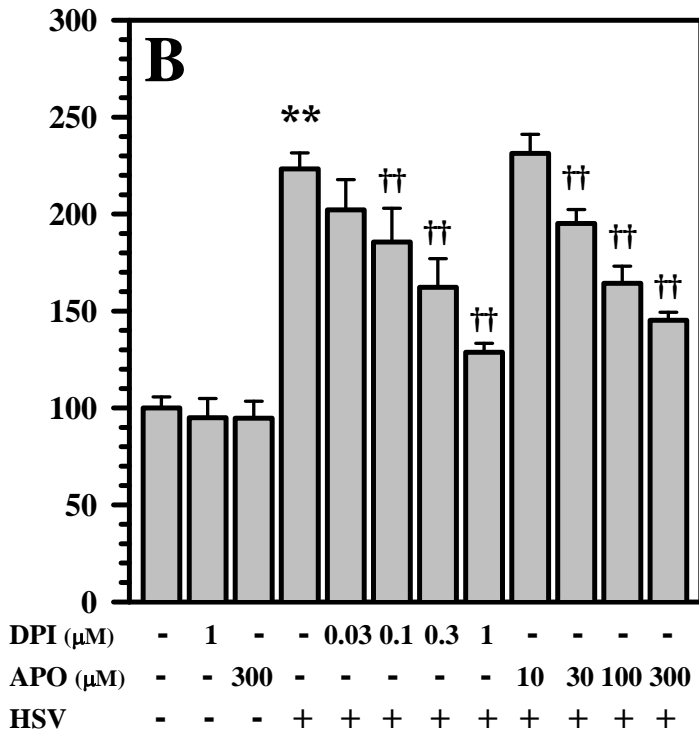

Supplement: MOESM2 [file 9601280]
